# Supplementary material for: LoMA-B: a simple and versatile lab-on-a-chip system based on single-channel bisulfite conversion for DNA methylation analysis
Source: Royal Society of Chemistry journal article supplement (doi:10.1039/c5lc00458f), 2015-01-01
Supplement: c5lc00458f1.pdf [file c5lc00458f1.pdf]

## **LoMA-B: A simple and versatile lab on a chip system based on single-channel bisulfite conversion for DNA methylation analysis**

Jaeyun Yoon<sup>1,2</sup>, Mi Kyoung Park<sup>1</sup>, Tae Yoon Lee<sup>1</sup>, Yong-Jin Yoon<sup>2,\*</sup>, Yong Shin<sup>1,\*</sup>

<sup>1</sup>Institute of Microelectronics, A\*STAR (Agency for Science, Technology and Research), 11 Science Park Road, Singapore Science Park II, Singapore 117685

<sup>2</sup>School of Mechanical & Aerospace Engineering, Nanyang Technological University, 50 Nanyang Avenue, Singapore 639789

\* Corresponding Author, E-mail Address to Y.S: [shiny@ime.a-star.edu.sg](mailto:shiny@ime.a-star.edu.sg), Tel: +65 6770 5764 or

Y.J.Y: [yongjiny@ntu.edu.sg](mailto:yongjiny@ntu.edu.sg), Tel: +65 6790 5033

### Contents:

Supplementary Figure S1.

Supplementary Figure S2.

Supplementary Table S1.

Supplementary Table S2.

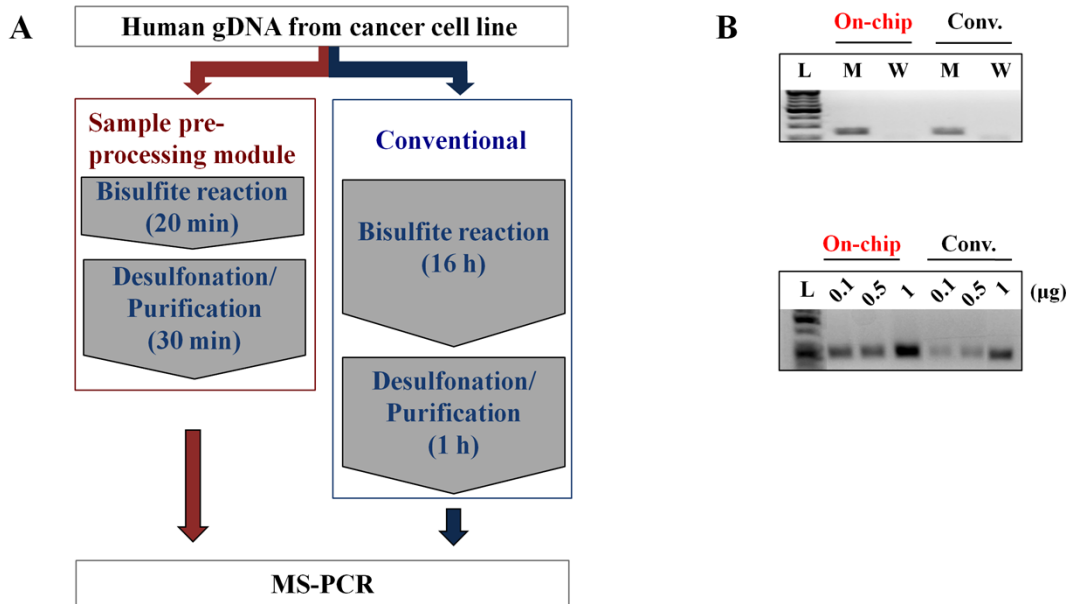

**Fig. S1:** Comparison of bisulfite conversion efficiency by sample pre-processing module and conventional method. (A) Comparison of bisulfite reaction time. By using proposed sample pre-processing module, overall reaction time is less than 50min compared to 17 h by conventional method. (B) MS-PCR using bisulfite converted gDNA (1  $\mu$ g) from MCF-7 by sample pre-processing module (On-chip) or conventional method (Conv.), methyl-specific (M) and wild-type (W) primer of RAR $\beta$  gene. (Top) MS-PCR using bisulfite converted DNA by two methods (On-chip or Conv.) and methyl-specific primer performed on various amounts of DNA converted (0.1, 0.5, and 1  $\mu$ g from left) (Bottom).

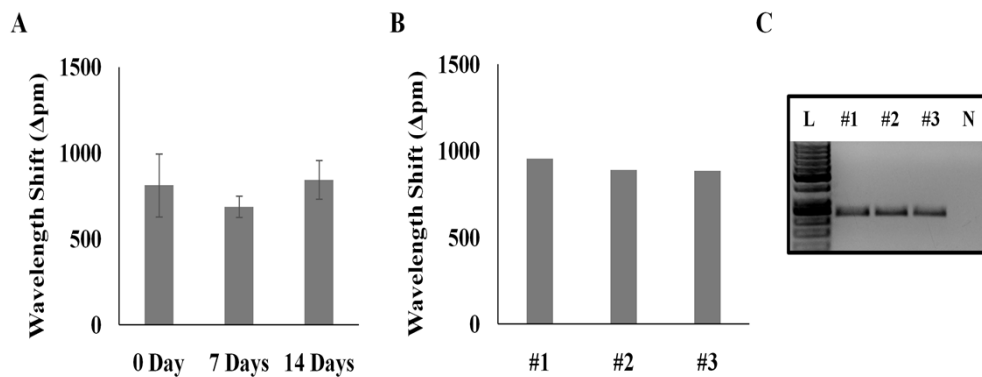

**Fig. S2.** Repeatability of LoMA-B system (sample pre-processing & detection module). (A) Long-term stability of grafting primers on silicon microring resonator (SMR) for storage possibility of detection module. (B) Reusability of detection module. All experiments were performed using the same SMR chip for detection of the bisulfite converted gDNA. The used chip was washed with NaOH to get rids of all bound molecules on the surface. (C) Reusability of sample pre-processing module. All experiments were performed using the same sample pre-processing module for bisulfite conversion of gDNA from MCF-7. The used chip was washed with dH<sub>2</sub>O to get rids of all bound molecules on the glass substrate. The DNA modified was analyzed by MS-PCR using the methyl-specific (M) primer.

**Table S1.** Primer sequences for LoMA-B system and conventional methods (MS-PCR/RT-PCR)

| Method                | Primer set                 | Sequence                                                                                       |
|-----------------------|----------------------------|------------------------------------------------------------------------------------------------|
| LoMA-B                | <u>Methyl-specific-F</u>   | 5'-NH <sub>2</sub> -(CH <sub>2</sub> ) <sub>6</sub> -AAAAAATTTGAAGGTTAGTAGTTCGGGTAGGGTTTATC-3' |
|                       | <u>Methyl-specific-R</u>   | 5'-NH <sub>2</sub> -(CH <sub>2</sub> ) <sub>6</sub> -AAAAATCCGAATCCTACCCCGACGGTGCCAGACAAA-3'   |
|                       | <u>Unmethyl-specific-F</u> | 5'-NH <sub>2</sub> -(CH <sub>2</sub> ) <sub>6</sub> -AAAAAATTTGAAGGTTAGTAGTTTGGGTAGGGTTTATT-3' |
|                       | <u>Unmethyl-specific-R</u> | 5'-NH <sub>2</sub> -(CH <sub>2</sub> ) <sub>6</sub> -AAAAATCCAAATCCTACCCCAACAATACCCAAACAAA-3'  |
| MS-PCR<br>&<br>RT-PCR | <u>Methyl-specific-F</u>   | 5'-GGTTAGTAGTTCGGGTAGGGTTTATC-3'                                                               |
|                       | <u>Methyl-specific-R</u>   | 5'-CCGAATCCTACCCCGACG-3'                                                                       |
|                       | <u>Unmethyl-specific-F</u> | 5'-TTAGTAGTTTGGGTAGGGTTTATT-3'                                                                 |
|                       | <u>Unmethyl-specific-R</u> | 5'-CCAAATCCTACCCCAACA-3'                                                                       |
|                       | <u>Wild-type-F</u>         | 5'-ATTGAAGGTTAGCAGCCCG-3'                                                                      |
|                       | <u>Wild-type-R</u>         | 5'-GCATCCCAGTCCTCAAACAG-3'                                                                     |

**Table S2.** Comparison of LoMA-B and existing methods based on PCR technique

|                        | LoMA-B                                                         | MS-PCR                             | MethyLight                                                              | MS-HRM                                                                           |
|------------------------|----------------------------------------------------------------|------------------------------------|-------------------------------------------------------------------------|----------------------------------------------------------------------------------|
| <b>Assay Time</b>      | 80 min                                                         | > 3h*                              | > 2h*                                                                   | > 2h*                                                                            |
| <b>Detection limit</b> | 1%                                                             | 0.1-1%                             | 0.1%                                                                    | 0.1-1%                                                                           |
| <b>Quantitative</b>    | Yes                                                            | No                                 | Yes                                                                     | Yes                                                                              |
| <b>Advantages</b>      | Cost-effective<br>Label-free<br>Automated sample<br>processing | Cost-effective                     | High sensitivity                                                        | Overcomes<br>false-positive                                                      |
| <b>Disadvantages</b>   | Requires primer<br>immobilization steps<br>on detection module | Labor-intensive,<br>False-positive | Limited to<br>detection of fully<br>methylated/unmeth<br>ylated alleles | Limited amplicon<br>length/number of<br>methylated sites<br>for high sensitivity |

\*Excluded reaction time for bisulfite conversion
